# Supplementary material for: Identification of important interacting proteins (IIPs) in Plasmodium falciparum using large-scale interaction network analysis and in-silico knock-out studies
Source: Malar J. 2015 Feb 8;14:70. doi: 10.1186/s12936-015-0562-1 (PMC4333160; doi:10.1186/s12936-015-0562-1)
Supplement: Additional file 5: Table S3. — Party hubs of Plasmodium falciparum. In this table party hubs of MN are mentioned along with their name and correlation coefficient. [file 12936_2015_562_MOESM5_ESM.xls]

## Sheet: Supplementary-table-1B
Party Hubs of Malaria Network
Party hub ID	Party hub name	Average PCC
PF11_0090	pescadillo-like protein (PES)	0.858484
PFD0745c	nonclathrin coat protein zeta2-cop-related protein, putative	0.845483
PF14_0676	20S proteasome beta 4 subunit, putative	0.811623
PF07_0027	DNA-directed RNA polymerase 2 8.2 kDa polypeptide, putative	0.805768
PF13_0341	DNA-directed RNA polymerase 2, putative	0.805706
PFE0850c	60S ribosomal protein L12, putative	0.803591
PF11_0106	apicoplast ribosomal protein L36e precursor, putative	0.801451
PFE0975c	40S ribosomal protein S24, putative	0.776798
PF13_0132	60S ribosomal protein L23a, putative	0.77529
PF14_0448	40S ribosomal protein S2, putative	0.771205
PF13_0014	40S ribosomal protein S7, putative	0.769475
PF13_0224	60S ribosomal protein L18, putative	0.76775
PF14_0627	40S ribosomal protein S3, putative	0.764354
PF14_0083	40S ribosomal protein S8e, putative	0.763043
PF11_0065	40S ribosomal protein S4, putative	0.759193
PFB0715w	DNA-directed RNA polymerase II second largest subunit, putative	0.75781
PF14_0579	60S ribosomal protein L27, putative	0.756092
PF14_0141	60S ribosomal protein L10, putative	0.755795
PFE0845c	60S ribosomal protein L8, putative	0.739826
PF13_0156	proteasome subunit beta type 7 precursor, putative	0.736264
PF08_0076	40S ribosomal protein S16, putative	0.728982
PF13_0178	translation initiation factor 6, putative	0.727945
PF14_0391	60S ribosomal protein L1, putative	0.719563
PF13_0213	60S ribosomal protein L6-2, putative	0.718894
PF10_0043	60S ribosomal protein L13, putative	0.698162
PF13_0316	40S ribosomal protein S13, putative	0.688978
PFB0455w	NO_ANNOTATION	0.685072
PF10_0187	60S ribosomal protein L30e, putative	0.683914
PF11_0313	60S ribosomal protein P0	0.682983
PF14_0230	60S ribosomal protein L5, putative	0.682351
PF11_0250	splicing factor, putative	0.681789
PFF0345w	translation initiation factor IF-2, putative	0.67788
PFF0885w	60S ribosomal protein L27a, putative	0.67132
PF08_0109	proteasome subunit alpha type 5, putative	0.668428
PFI0190w	60S ribosomal protein L32, putative	0.665982
PF13_0129	60S ribosomal protein L6, putative	0.665101
PFB0370c	RNA binding protein, putative	0.662753
PFC0200w	NO_ANNOTATION	0.655377
PF10_0269	DNA-directed RNA polymerase II, putative	0.652977
PF08_0019	receptor for activated c kinase (RACK)	0.647076
PF14_0068	fibrillarin, putative (NOP1)	0.633682
PF13_0268	60S ribosomal protein L17, putative	0.620394
PF08_0075	60S ribosomal protein L13-2, putative	0.601622
PFE0350c	60S ribosomal protein L4, putative	0.600426
PFE0810c	40S ribosomal protein S14, putative	0.592939
PFF0970w	splicing factor 3A subunit 2, putative (SF3A2)	0.589554
PFE1005w	40S ribosomal protein S9, putative	0.588577
MAL3P4	NO_ANNOTATION	0.578135
PF14_0231	60S ribosomal protein L7-3, putative	0.563107
PF13_0049	60S ribosomal protein L24, putative	0.535356
PF14_0411	U6 snRNA-associated Sm-like protein LSm5, putative (LSM5)	0.530258
PFD0180c	CGI-201 protein, short form	0.52862
PFF0700c	60S ribosomal protein L19, putative	0.519128
PF07_0079	60S ribosomal protein L11a, putative	0.417439
