# Supplementary material for: Identification of important interacting proteins (IIPs) in Plasmodium falciparum using large-scale interaction network analysis and in-silico knock-out studies
Source: Malar J. 2015 Feb 8;14:70. doi: 10.1186/s12936-015-0562-1 (PMC4333160; doi:10.1186/s12936-015-0562-1)
Supplement: Additional file 24: Table S9. — Interaction details of PFI1475w (MSP1) in Plasmodium and human. This table shows the complex interaction pattern of a virulent Plasmodium protein and its corresponding human interactions. [file 12936_2015_562_MOESM24_ESM.xls]

## Sheet: msp1-table
Interaction Details of MSP1 in Plasmodium and Human
Plasmodium					Human
Protein ID	Protein name	Protein Stage*	Pathway ID	Pathway name	Protein id	Protein number as marked in Figure 8	Protein name	Pathway ID (KEGG)	Pathway Name
MAL13P1.202	conserved Plasmodium protein, unknown function	G,SC,SP,T,	NA	NO_KNOWN_PATHWAY	NO_HUMAN_PARTNER	NA	NA	NA	NA
MAL13P1.295	conserved Plasmodium protein, unknown function	G,R,SC,SP,T,	NA	NO_KNOWN_PATHWAY	NO_HUMAN_PARTNER	NA	NA	NA	NA
MAL13P1.308	conserved Plasmodium protein, unknown function	G,M,R,SC,SP,T,	NA	NO_KNOWN_PATHWAY	NO_HUMAN_PARTNER	NA	NA	NA	NA
MAL13P1.343	proteasome regulatory subunit, putative	G,R,SC,T,	proteaUbiqpath	Proteasome-mediated proteolysis of ubiquinated proteins	NO_HUMAN_PARTNER	NA	NA	NA	NA
MAL7P1.19	ubiquitin transferase, putative	G,M,R,SC,SP,T,	proteaUbiqpath	Proteasome-mediated proteolysis of ubiquinated proteins	NO_HUMAN_PARTNER	NA	NA	NA	NA
MAL8P1.23	E3 Ubiquitin ligase	G,R,SC,SP,T	ProteaUbiqpath	Proteasome-mediated proteolysis of ubiquinated proteins	CENTB5	1	ArfGAP with coiled-coil, ankyrin repeat and PH domains 3	NO_PATHWAY_IN_KEGG	NA
					CKAP5	2	cytoskeleton associated protein 5	NO_PATHWAY_IN_KEGG	NA
					DYNC1H1	3	dynein heavy chain 1, cytosolic	ko04145	Phagosome
								ko04962	Vasopressin-regulated water reabsorption
								ko05132	Salmonella infection
					PRKCB1	4	protein kinase C, beta	NO_PATHWAY_IN_KEGG	NA
					SPTBN4	5	spectrin, beta, non-erythrocytic 4
MAL8P1.69	14-3-3 protein, putative	G,M,R,SC,SP,T,	acet_recog_mod	Acetylation recognition by the bromodomain and other modules	C3orf58	26	chromosome 3 open reading frame 58	NO_PATHWAY_IN_KEGG	NA
					C5orf5	27	family with sequence similarity 13, member B
					CEP170	28	centrosomal protein 170kDa
					IFT20	29	intraflagellar transport 20 homolog (Chlamydomonas)
					KLHL5	30	kelch-like family member 5
					MADD	31	MAP-kinase activating death domain
					MYO1E	32	myosin IE
					RABGAP1	33	RAB GTPase activating protein 1
					YWHAE	34	tyrosine 3-monooxygenase/tryptophan 5-monooxygenase activation protein	ko04110	Cell cycle
								ko04114	Oocyte meiosis
								ko04722	Neurotrophin signaling pathway
PF07_0042	conserved Plasmodium protein, unknown function	G,	NA	NO_KNOWN_PATHWAY	NO_HUMAN_PARTNER		NA	NA	NA
PF08_0054	heat shock protein 70 (Hsp70)	G,M,R,SC,SP,T,	ProteasomeMeditated	Proteasome-mediated degradation of non-native ER proteins	NO_HUMAN_PARTNER		NA	NA	NA
			chapfold	Chaperone-assisted protein folding
			eukaryotes	Posttranslational translocation in eukaryotes
			importMito	Import of proteins into the mitochondrion
PF08_0132	glutamate dehydrogenase, putative (GDHc)	G,R,SC,SP,T,	glutamatemetpath	Glutamate metabolism	NO_HUMAN_PARTNER		NA	NA	NA
			nitrogenmetpath	Nitrogen metabolism
PF10_0232	chromodomain-helicase-DNA-binding protein 1 homolog, putative (CHD1)	G,M,R,SC,SP,T,	NucleoAssembly	Nucleosome assembly and regulation	NO_HUMAN_PARTNER		NA	NA	NA
			chrom_remod	ATP-dependent chromatin remodeling complexes
PF10_0254	conserved Plasmodium protein, unknown function	G,SC,SP,T,	NA	NO_KNOWN_PATHWAY	NO_HUMAN_PARTNER		NA	NA	NA
PF11_0168	rhoptry neck protein 4 (RON4)	G,SC,T,	NA	NO_KNOWN_PATHWAY	DST	9	Dystonin	NO_PATHWAY_IN_KEGG	NA
					YTHDF2	8	YTH domain-containing family protein 2
PF11_0193	conserved Plasmodium protein, unknown function	G,SP,	NA	NO_KNOWN_PATHWAY	NO_HUMAN_PARTNER		NA	NA	NA
PF11_0268	kelch protein, putative	M,R,SC,SP,T,	NA	NO_KNOWN_PATHWAY	NO_HUMAN_PARTNER		NA	NA	NA
PF13_0036	DnaJ protein, putative	G,SC,T,	chapfold	Chaperone-assisted protein folding	NO_HUMAN_PARTNER		NA	NA	NA
							NA	NA	NA
PF13_0200	conserved Plasmodium protein, unknown function	SC,	NA	NO_KNOWN_PATHWAY	NO_HUMAN_PARTNER		NA	NA	NA
PF14_0252	conserved Plasmodium protein, unknown function	G,	NA	NO_KNOWN_PATHWAY	KIAA0376	22	sperm antigen with calponin homology and coiled-coil domains 1-like	NO_PATHWAY_IN_KEGG	NA
					SCAPER	23	S-phase cyclin A-associated protein in the ER	NO_PATHWAY_IN_KEGG	NA
PF14_0270	apicoplast ribosomal protein L15 precursor, putative	G,R,SC,SP,T,	prokaryotes	Translation in prokaryotes a template for apicoplast and mitochondrion	NO_HUMAN_PARTNER	NA	NA	NA	NA
			ribosomeStruct	Ribosomal structure
PF14_0323	calmodulin	G,R,SC,SP,T,	calmodulin	Calcium calmodulin activation of protein kinases	NO_HUMAN_PARTNER	NA	NA	NA	NA
PF14_0338	NO_ANNOTATION	G,M,R,SC,SP,T,	NA	NO_KNOWN_PATHWAY	NO_HUMAN_PARTNER	NA	NA	NA	NA
PF14_0344	translocon component PTEX150 (PTEX150)	G,M,R,SC,SP,T,	NA	NO_KNOWN_PATHWAY	NO_HUMAN_PARTNER	NA	NA	NA	NA
PF14_0700	DnaJ protein, putative	G,R,SC,SP,T,	NA	NO_KNOWN_PATHWAY	NO_HUMAN_PARTNER	NA	NA	NA	NA
PF14_0731	NO_ANNOTATION	G,R,SP,T,	NA	NO_KNOWN_PATHWAY	NO_HUMAN_PARTNER	NA	NA	NA	NA
PFB0260w	proteasome 26S regulatory subunit, putative	G,R,SC,SP,T,	proteaUbiqpath	Proteasome-mediated proteolysis of ubiquinated proteins	NO_HUMAN_PARTNER	NA	NA	NA	NA
PFB0480w	syntaxin, Qa-SNARE family (SYN17)	G,	rabCycle	Rab cycle	NO_HUMAN_PARTNER	NA	NA	NA	NA
			vesExocytosis	Molecular model of vesicle exocytosis
PFB0765w	conserved Plasmodium protein, unknown function	SP,	NA	NO_KNOWN_PATHWAY	NO_HUMAN_PARTNER	NA	NA	NA	NA
PFC0120w	cytoadherence linked asexual protein 3.1 (CLAG3.1)	G,M,R,SC,SP,T,	Merozoiteproteins	Functional annotation of merozoite invasion-related proteins	MYO7A	19	myosin VIIA	NO_PATHWAY_IN_KEGG	NA
			proteinsLocalizpath	Subcellular localization of proteins involved in invasion
PFC0370w	conserved Plasmodium protein, unknown function	SC,SP,	NA	NO_KNOWN_PATHWAY	NO_HUMAN_PARTNER	NA	NA	NA	NA
PFC0720w	conserved Plasmodium protein, unknown function	SC,	NA	NO_KNOWN_PATHWAY	NO_HUMAN_PARTNER	NA	NA	NA	NA
PFD0010w	NO_ANNOTATION	SC,T,	NA	NO_KNOWN_PATHWAY	NO_HUMAN_PARTNER	NA	NA	NA	NA
PFD0080c	Plasmodium exported protein (PHISTb), unknown function (PfD80)	R,SC,T,	NA	NO_KNOWN_PATHWAY	NO_HUMAN_PARTNER	NA	NA	NA	NA
PFD0535w	conserved Plasmodium protein, unknown function	G,SC,SP,T,	NA	NO_KNOWN_PATHWAY	NO_HUMAN_PARTNER	NA	NA	NA	NA
PFD0950w	ran binding protein 1, putative	G,M,R,SC,SP,T,	import_export	Import and export through the nuclear pore	NO_HUMAN_PARTNER	NA	NA	NA	NA
PFE0040c	mature parasite-infected erythrocyte surface antigen,erythrocyte membrane protein 2 (MESA)	R,SC,T,	cytoadherencescheme	interactions between modified host cell membrane and endothelial cell	ABCA5	15	ATP-binding cassette, subfamily A (ABC1), member 5	ko02010	ABC transporters
					ANK2	16	SH3 and multiple ankyrin repeat domains 2	NO_PATHWAY_IN_KEGG	NA
					ANK3	17	SH3 and multiple ankyrin repeat domains 3
					LOC643445	18	Unidentified Protein
PFE0430w	Pre-mRNA-processing ATP-dependent RNA helicase prp5, putative (PRP5)	G,SC,	splicing	Splicing of pre-mRNA	NO_HUMAN_PARTNER	NA	NA	NA	NA
PFE0595w	prefoldin subunit, putative	G,R,SC,SP,T,	chapfold	Chaperone-assisted protein folding	NO_HUMAN_PARTNER	NA	NA	NA	NA
PFE0770w	conserved Plasmodium protein, unknown function	G,	NA	NO_KNOWN_PATHWAY	NO_HUMAN_PARTNER	NA	NA	NA	NA
PFE1345c	minchromosome maintenance (MCM) complex subunit, putative (MCM3)	G,R,SC,SP,T,	replicationForm	Pre-replicative complex formation and transition to replication	NO_HUMAN_PARTNER	NA	NA	NA	NA
PFE1465w	conserved Plasmodium protein, unknown function	G,SC,T,	NA	NO_KNOWN_PATHWAY	DNM1	10	dynamin GTPase [EC:3.6.5.5]	ko04144	Endocytosis
								ko04666	Fc gamma R-mediated phagocytosis
								ko04721	Synaptic vesicle cycle
								ko04961	Endocrine and other factor-regulated calcium reabsorption
								ko05100	Bacterial invasion of epithelial cells
					DST	9	dystonin	NO_PATHWAY_IN_KEGG
					SEC31A	11	protein transport protein SEC31	ko04141	Protein processing in endoplasmic reticulum
					SPOCK2	12	sparc/osteonectin, cwcv and kazal-like domains proteoglycan (testican) 2	NO_PATHWAY_IN_KEGG
PFE1605w	Plasmodium exported protein (PHISTb), unknown function	R,SC,T,	NA	NO_KNOWN_PATHWAY	CLSTN1	6	calsyntenin 1	NO_PATHWAY_IN_KEGG
					EPB41	7	erythrocyte membrane protein band 4.1	ko04530	Tight junction
PFF0675c	myosin E, putative (PfmyoE)	NO_STAGE_INFORMATION	molecularMotor	Molecular motor prototypes	NO_HUMAN_PARTNER	NA	NA	NA	NA
PFF0930w	conserved Plasmodium protein, unknown function	NO_STAGE_INFORMATION	NA	NO_KNOWN_PATHWAY	NO_HUMAN_PARTNER	NA	NA	NA	NA
PFF1110c	coronin binding protein, putative	NO_STAGE_INFORMATION	actin	Actin and filaments	GDAP2	20	ganglioside induced differentiation associated protein 2	NO_PATHWAY_IN_KEGG
PFI0250c	nucleoporin NUP100/NSP100, putative (NUP100)	G,M,R,SC,SP,T,	nuclearPore	Structure of the nuclear pore	NO_HUMAN_PARTNER	NA
PFI0265c	high molecular weight rhoptry protein 3 (RhopH3)	G,R,SC,T,	proteinsLocalizpath	Subcellular localization of proteins involved in invasion	ARFGAP1	24	ADP-ribosylation factor GTPase-activating protein 1	ko04144	Endocytosis
					TRAF1	25	TNF receptor-associated factor 1	ko05168	Herpes simplex infection
								ko05200	Pathways in cancer
								ko05202	Transcriptional misregulation in cancer
								ko05222	Small cell lung cancer
PFI1720w	gametocytogenesis-implicated protein (GIG)	G,M,R,SC,SP,T,	NA	NO_KNOWN_PATHWAY	RAB23	13	Ras-related protein Rab-23	ko04340	Hedgehog signaling pathway
					STK3	14	serine/threonine kinase 3 [EC:2.7.11.5]	ko04010	MAPK signaling pathway
PFL0305c	IMP-specific 5'-nucleotidase, putative,haloacid dehalogenase hydrolase, putative	G,SC,SP,	purinemetpath	Purine metabolism	NO_HUMAN_PARTNER	NA	NA	NA	NA
PFL0335c	eukaryotic translation initiation factor 5, putative	G,M,R,SC,SP,T,	intTranslation	Initiation of translation	NO_HUMAN_PARTNER	NA	NA	NA	NA
PFL0350c	conserved Plasmodium protein, unknown function	G,SC,	NA	NO_KNOWN_PATHWAY	EEA1	21	early endosome antigen 1	ko04144	Endocytosis
								ko04145	Phagosome
								ko05152	Tuberculosis
PFL1385c	merozoite surface protein 9 (MSP9)	G,R,SC,T,	proteinsLocalizpath	Subcellular localization of proteins involved in invasion	NO_HUMAN_PARTNER	NA	NA	NA	NA
*Protein Stages
G=Gametocyte
M=Merozoite
SC=Schizont
SP=Sporozoite
T=Trophozoitre
R=RING Stage
